# Supplementary material for: Associations between compensable injury, perceived fault and pain and disability 1 year after injury: a registry-based Australian cohort study
Source: PubMed Central journal article supplement (PMC5639991; doi:10.1136/bmjopen-2017-017350), 2017-10-05
Supplement: bmjopen-2017-017350supp001.pdf [file bmjopen-2017-017350supp001.pdf]

SUPPLEMENTARY

**Supplementary Table 1**

*Multiple regression for association between injury characteristics and pain interference (only for pain intensity >0; N=370), EQ-5D, and GOS-E recovery outcome.*

| Injury characteristics       |                  | Pain Interference |      |              |                    | EQ-5D Summary Score |      |              |                    | GOS-E Functional Outcome |      |             |                  |
|------------------------------|------------------|-------------------|------|--------------|--------------------|---------------------|------|--------------|--------------------|--------------------------|------|-------------|------------------|
|                              |                  | M                 | (sd) | $\beta$      | (95% CI)           | M                   | (sd) | $\beta$      | (95% CI)           | N                        | %    | OR          | (95% CI)         |
| <b>Comorbidities</b>         | None             | 2.91              | 2.42 | Ref          |                    | 0.82                | 0.22 | Ref          |                    | 137                      | 50.6 | Ref         |                  |
|                              | Present          | 3.27              | 2.62 | 0.23         | -0.03,0.78         | 0.77                | 0.25 | -0.05        | -0.10,0            | 73                       | 47.1 | 0.86        | 0.56,1.31        |
| <b>Work status at injury</b> | Not working      | 3.97              | 2.87 | Ref          |                    | 0.72                | 0.33 | Ref          |                    | 37                       | 68.5 | Ref         |                  |
|                              | Working          | 2.91              | 2.41 | <b>-1.00</b> | <b>-1.87,-0.13</b> | 0.82                | 0.21 | <b>0.10</b>  | <b>0.01,0.19</b>   | 173                      | 46.5 | <b>0.40</b> | <b>0.20,0.80</b> |
| <b>Injury place</b>          | At home          | 2.48              | 2.39 | Ref          |                    | 0.82                | 0.24 | Ref          |                    | 44                       | 57.9 | Ref         |                  |
|                              | Traffic/Road     | 3.60              | 2.61 | <b>1.02</b>  | <b>0.26, 1.78</b>  | 0.77                | 0.25 | -0.03        | -0.10,0.04         | 66                       | 39.5 | 0.67        | 0.37,1.23        |
|                              | Workplace        | 3.60              | 2.38 | <b>1.21</b>  | <b>0.26, 2.16</b>  | 0.74                | 0.25 | -0.08        | -0.17,0.01         | 14                       | 31.1 | <b>0.37</b> | <b>0.17,0.80</b> |
|                              | Other            | 2.43              | 2.24 | 0.15         | -0.62, 0.92        | 0.86                | 0.18 | 0.04         | -0.03,0.10         | 86                       | 62.3 | 1.37        | 0.74,2.26        |
| <b>Injury severity</b>       | AIS region count |                   |      | <b>0.37</b>  | <b>0.14, 0.61</b>  |                     |      | <b>-0.03</b> | <b>-0.06,-0.01</b> |                          |      | <b>0.70</b> | <b>0.58,0.82</b> |
| <b>Hospital stay</b>         | 1-2 days         | 2.48              | 2.35 | Ref          |                    | 0.83                | 0.24 | Ref          |                    | 95                       | 60.5 | Ref         |                  |
|                              | 3-6 days         | 3.26              | 2.46 | <b>0.72</b>  | <b>0.06, 1.37</b>  | 0.81                | 0.22 | -0.01        | -0.06,0.05         | 69                       | 52.3 | 0.80        | 0.49,1.30        |
|                              | 7-13 days        | 2.88              | 2.52 | 0.30         | -0.49, 1.09        | 0.82                | 0.19 | 0.01         | -0.05,0.07         | 35                       | 43.8 | 0.61        | 0.34,1.10        |
|                              | ≥ 14 days        | 4.34              | 2.49 | <b>1.65</b>  | <b>0.76, 2.55</b>  | 0.70                | 0.27 | <b>-0.10</b> | <b>-0.19,-0.02</b> | 10                       | 17.9 | <b>0.18</b> | <b>0.08,0.42</b> |
| <b>Type of discharge</b>     | Home             | 2.65              | 2.29 | Ref          |                    | 0.84                | 0.22 | Ref          |                    | 168                      | 55.6 | Ref         |                  |
|                              | Rehabilitation   | 3.91              | 2.72 | <b>0.99</b>  | <b>0.38, 1.61</b>  | 0.73                | 0.25 | <b>-0.08</b> | <b>-0.14,-0.03</b> | 42                       | 33.9 | <b>0.51</b> | <b>0.32,0.82</b> |

|                            |              |      |      |             |                   |      |      |              |                    |     |      |             |                  |
|----------------------------|--------------|------|------|-------------|-------------------|------|------|--------------|--------------------|-----|------|-------------|------------------|
| <b>Compensation status</b> | None         | 2.53 | 2.32 | Ref         |                   | 0.84 | 0.22 | Ref          |                    | 155 | 58.7 | Ref         |                  |
|                            | TAC/Worksafe | 3.82 | 2.57 | <b>1.16</b> | <b>0.61, 1.71</b> | 0.75 | 0.25 | <b>-0.07</b> | <b>-0.12,-0.02</b> | 55  | 34   | <b>0.44</b> | <b>0.28,0.67</b> |
| <b>Fault</b>               | At fault     | 2.42 | 2.14 | Ref         |                   | 0.85 | 0.19 | Ref          |                    | 124 | 57.9 | Ref         |                  |
|                            | Not at fault | 3.63 | 2.68 | <b>1.15</b> | <b>0.66, 1.64</b> | 0.76 | 0.26 | <b>-0.09</b> | <b>-0.13,-0.05</b> | 83  | 39.9 | <b>0.51</b> | <b>0.34,0.76</b> |

Notes: all analysis adjusted for age, sex and injury severity, except for the injury severity analysis which only adjusted for age and sex.

Supplementary Table 2

*Multiple regression for association between injury characteristics, pain catastrophising, pain self-efficacy, kinesiophobia and injustice experience.*

| Injury characteristics       |                  | PCS   |       |              |                  | PSEQ  |       |              |                    |
|------------------------------|------------------|-------|-------|--------------|------------------|-------|-------|--------------|--------------------|
|                              |                  | M     | (sd)  | $\beta^{**}$ | (95% CI)         | M     | (sd)  | $\beta^{**}$ | (95% CI)           |
| <b>Comorbidities</b>         | None             | 9.54  | 11.23 | Ref          |                  | 45.63 | 14.19 | Ref          |                    |
|                              | Present          | 9.30  | 10.6  | 0.32         | -1.31,1.94       | 45.02 | 14.68 | -0.34        | -2.68,2.01         |
| <b>Work status at injury</b> | Not working      | 11.65 | 12.61 | Ref          |                  | 40.99 | 15.12 | Ref          |                    |
|                              | Working          | 9.12  | 10.71 | -0.06        | -2.57,2.44       | 46.63 | 14.46 | 1.71         | -1.22,4.65         |
| <b>Injury place</b>          | At home          | 8.18  | 10.67 | Ref          |                  | 47.41 | 12.01 | Ref          |                    |
|                              | Traffic/Road     | 11.38 | 11.81 | 0.85         | -1.49,3.20       | 42.7  | 15.27 | -2.32        | -5.09,0.46         |
|                              | Workplace        | 11.13 | 11.3  | 0.52         | -2.48,3.53       | 43.11 | 15.41 | -1.44        | -6.26,3.38         |
|                              | Other            | 7.18  | 9.49  | -1.27        | -3.55,1.00       | 48.43 | 13.37 | -0.10        | -2.97,2.76         |
| <b>Injury severity</b>       | AIS region count |       |       | 0.28         | -0.51,1.06       |       |       | -0.94        | -1.96,0.08         |
| <b>Hospital stay</b>         | 1-2 days         | 7.91  | 10.00 | Ref          |                  | 49.11 | 12.57 | Ref          |                    |
|                              | 3-6 days         | 9.77  | 11.3  | 0.69         | -1.31,2.68       | 43.81 | 14.99 | <b>-3.34</b> | <b>-6.05,-0.63</b> |
|                              | 7-13 days        | 9.24  | 10.55 | 1.94         | -0.09,3.98       | 45.33 | 13.96 | <b>-4.02</b> | <b>-7.27,-0.77</b> |
|                              | ≥ 14 days        | 13.25 | 12.76 | 2.40         | -0.31,5.11       | 38.89 | 15.5  | <b>-5.70</b> | <b>-9.16,-2.23</b> |
| <b>Type of discharge</b>     | Home             | 7.92  | 9.67  | Ref          |                  | 47.41 | 13.61 | Ref          |                    |
|                              | Rehabilitation   | 13.08 | 12.97 | <b>2.56</b>  | <b>0.63,4.50</b> | 40.71 | 15.01 | <b>-2.76</b> | <b>-5.10,-0.42</b> |
| <b>Compensation status</b>   | None             | 8.04  | 10.12 | Ref          |                  | 47.91 | 13.29 | Ref          |                    |
|                              | TAC/Worksafe     | 11.67 | 11.93 | 1.06         | -0.72,2.84       | 41.43 | 15.12 | <b>-3.32</b> | <b>-5.55,-1.10</b> |

|              |              |       |       |             |                  |       |       |              |                    |
|--------------|--------------|-------|-------|-------------|------------------|-------|-------|--------------|--------------------|
| <b>Fault</b> | At fault     | 7.22  | 9.72  | Ref         |                  | 48.94 | 12.07 | Ref          |                    |
|              | Not at fault | 11.67 | 11.80 | <b>2.11</b> | <b>0.57,3.65</b> | 41.87 | 15.63 | <b>-4.29</b> | <b>-6.45,-2.11</b> |

Notes: all analysis adjusted for age, sex and injury severity, except for the injury severity analysis which only adjusted for age and sex.

Supplementary tables

(Supplementary Table 2 continued)

| Injury characteristics       |                  | TSK   |      |              |            | IEQ   |       |              |                   |
|------------------------------|------------------|-------|------|--------------|------------|-------|-------|--------------|-------------------|
|                              |                  | M     | (sd) | $\beta^{**}$ | (95% CI)   | M     | (sd)  | $\beta^{**}$ | (95% CI)          |
| <b>Comorbidities</b>         | None             | 36.99 | 8.32 | Ref          |            | 15.99 | 13.6  | Ref          |                   |
|                              | Present          | 37.32 | 7.99 | 0.80         | -0.65,2.24 | 16.67 | 13.75 | 1.14         | -1.17,3.46        |
| <b>Work status at injury</b> | Not working      | 37.81 | 9.33 | Ref          |            | 17.68 | 14.27 | Ref          |                   |
|                              | Working          | 37    | 8.01 | 0.47         | -1.70,2.64 | 16.02 | 13.55 | 0.80         | -2.83,4.42        |
| <b>Injury place</b>          | At home          | 36.97 | 7.86 | Ref          |            | 12.57 | 11.06 | Ref          |                   |
|                              | Traffic/Road     | 37.53 | 8.05 | -0.93        | -2.82,0.95 | 19.22 | 14.43 | <b>4.20</b>  | <b>1.25,7.16</b>  |
|                              | Workplace        | 39.76 | 7.63 | 0.96         | -1.55,3.48 | 19.39 | 13.6  | <b>4.20</b>  | <b>0.08,8.32</b>  |
|                              | Other            | 35.79 | 8.56 | -1.78        | -3.85,0.29 | 13.51 | 12.97 | 1.03         | -2.17,4.24        |
| <b>Injury severity</b>       | AIS region count |       |      | -0.20        | -0.76,0.35 |       |       | 0.95         | -0.02,1.91        |
| <b>Hospital stay</b>         | 1-2 days         | 36.66 | 7.77 | Ref          |            | 12.54 | 12.57 | Ref          |                   |
|                              | 3-6 days         | 37.45 | 8.62 | -0.14        | -1.82,1.54 | 17.41 | 13.82 | <b>3.71</b>  | <b>1.04,6.37</b>  |
|                              | 7-13 days        | 36.98 | 8.1  | 0.44         | -1.47,2.36 | 16.81 | 13.11 | <b>4.84</b>  | <b>1.50,8.19</b>  |
|                              | $\geq 14$ days   | 37.77 | 8.64 | -0.96        | -3.41,1.49 | 22.55 | 14.14 | <b>7.05</b>  | <b>3.26,10.34</b> |
| <b>Type of discharge</b>     | Home             | 36.52 | 8.14 | Ref          |            | 14.09 | 12.87 | Ref          |                   |
|                              | Rehabilitation   | 38.53 | 8.18 | 0.74         | -0.85,2.33 | 21.31 | 14.12 | <b>4.35</b>  | <b>1.88,6.81</b>  |
| <b>Compensation status</b>   | None             | 36.3  | 8.05 | Ref          |            | 13.66 | 12.51 | Ref          |                   |
|                              | TAC/Worksafe     | 38.37 | 8.28 | 0.86         | -0.58,2.31 | 20.31 | 14.39 | <b>3.95</b>  | <b>1.60,6.31</b>  |

|              |              |       |      |      |            |       |       |             |                  |
|--------------|--------------|-------|------|------|------------|-------|-------|-------------|------------------|
| <b>Fault</b> | At fault     | 36.19 | 7.79 | Ref  |            | 11.94 | 11.1  | Ref         |                  |
|              | Not at fault | 38.03 | 8.54 | 0.54 | -0.81,1.89 | 20.5  | 14.62 | <b>6.35</b> | <b>4.23,8.48</b> |

Notes: all analysis adjusted for age, sex, pain intensity and injury severity.

Supplementary tables

Supplementary Table 3a

*Direct and indirect effects between predictors and pain interference, adjusting for age, sex, pain intensity and injury severity*

|                                           | Indirect effects |           |         | % of total effect mediated | Direct effects |
|-------------------------------------------|------------------|-----------|---------|----------------------------|----------------|
|                                           | B                | (95% CI)  | p-value |                            | p-value        |
| <b>Mediation via Pain Self-Efficacy</b>   |                  |           |         |                            |                |
| Compensation status                       | 0.24             | 0.07,0.41 | 0.006   | 36.9%                      | 0.016          |
| Fault                                     | 0.25             | 0.09,0.41 | 0.002   | 37.7%                      | 0.010          |
| <b>Mediation via Pain Catastrophising</b> |                  |           |         |                            |                |
| Compensation status <sup>a</sup>          | n/a              | n/a       | n/a     | n/a                        | n/a            |
| Fault                                     | 0.17             | 0.03,0.32 | 0.017   | 26.0%                      | 0.001          |
| <b>Mediation via Perceived Injustice</b>  |                  |           |         |                            |                |
| Compensation status                       | 0.25             | 0.10,0.40 | 0.001   | 39.1%                      | 0.017          |
| Fault                                     | 0.34             | 0.19,0.48 | <0.001  | 50.4%                      | 0.027          |

*Notes*, all analysis adjusted only for age, sex, pain intensity and injury severity. <sup>a</sup> Compensation status was not associated with catastrophising, so mediation not examined.

Supplementary Table 3b

*Combined mediation effects between predictors (fault attribution and compensation status) and pain interference*

|                         | <b>Fault attribution</b> | <b>Compensation</b> |
|-------------------------|--------------------------|---------------------|
| Total indirect effect   |                          |                     |
| β (95% CI)              | 0.08 (0.04,0.12)         | 0.07 (0.03,0.10)    |
| p-value                 | <0.001                   | <0.001              |
| % of mediated           |                          |                     |
| Total effect            | 59.3%                    | 48.7%               |
| Pain self-efficacy      | 23.9%                    | 25.1%               |
| Perceived injustice     | 19.3%                    | 23.6%               |
| Pain Catastrophising    | 16.2%                    | n/a                 |
| Direct effect (p-value) |                          |                     |
| β (95% CI)              | 0.05 (0.00, 0.11)        | 0.06 (0.00,0.12)    |
| p-value                 | 0.055                    | 0.051               |

*Notes*: all analysis adjusted only for age, sex, pain intensity and injury severity.

Supplementary Table 3c

Direct and indirect effects between predictors and health status (EQ-5D), adjusting for age, sex and injury severity

|                                           | Indirect effects |               |         |                            | Direct effects <sup>a</sup> |         |
|-------------------------------------------|------------------|---------------|---------|----------------------------|-----------------------------|---------|
|                                           | B                | (95% CI)      | p-value | % of total effect mediated |                             | p-value |
| <b>Mediation via Pain Self-Efficacy</b>   |                  |               |         |                            |                             |         |
| Compensation status                       | -0.016           | -0.029,-0.002 | 0.022   | 34.8%                      |                             | 0.121   |
| Fault                                     | -0.020           | -0.035,-0.004 | 0.012   | 33.5%                      |                             | 0.026   |
| <b>Mediation via Pain Catastrophising</b> |                  |               |         |                            |                             |         |
| Compensation status <sup>a</sup>          | n/a              | n/a           | n/a     | n/a                        |                             | n/a     |
| Fault                                     | -0.014           | -0.026,-0.002 | 0.026   | 24.1%                      |                             | 0.011   |
| <b>Mediation via Perceived Injustice</b>  |                  |               |         |                            |                             |         |
| Compensation status                       | -0.017           | -0.034,-0.008 | 0.008   | 37.0%                      |                             | 0.151   |
| Fault                                     | -0.026           | -0.042,-0.015 | <0.001  | 46.1%                      |                             | 0.070   |

Notes, all analysis adjusted only for age, sex, pain intensity and injury severity. <sup>a</sup> Compensation status was not associated with catastrophising, so mediation not examined.

Supplementary Table 3d

Combined mediation effects between predictors (fault attribution and compensation status) and EQ-5D

|                         | Fault attribution      | Compensation           |
|-------------------------|------------------------|------------------------|
| Total indirect effect   |                        |                        |
| $\beta$ (95% CI)        | -0.068 (-0.103,-0.033) | -0.048 (-0.079,-0.016) |
| p-value                 | <0.001                 | 0.002                  |
| % of mediated           |                        |                        |
| Total effect            | 54.0%                  | 50.1%                  |
| Pain self-efficacy      | 21.7%                  | 26.0%                  |
| Perceived injustice     | 16.9%                  | 24.1%                  |
| Pain Catastrophising    | 15.5%                  | n/a                    |
| Direct effect (p-value) |                        |                        |
| $\beta$ (95% CI)        | -0.058 (-0.130,0.014)  | -0.047 (-0.130,0.035)  |
| p-value                 | 0.114                  | 0.258                  |

Notes, all analysis adjusted only for age, sex, pain intensity and injury severity.



Supplementary Table 3e

Direct and indirect effects between predictors and functional outcome (GOS-E), adjusting for age, sex and injury severity

|                                           | Indirect effects |               |         | Direct effects <sup>a</sup> |         |
|-------------------------------------------|------------------|---------------|---------|-----------------------------|---------|
|                                           | B                | (95% CI)      | p-value | % of total effect mediated  | p-value |
| <b>Mediation via Pain Self-Efficacy</b>   |                  |               |         |                             |         |
| Compensation status                       | -0.025           | -0.055,0.006  | 0.110   | 11.8%                       | 0.004   |
| Fault                                     | -0.032           | -0.062,-0.001 | 0.041   | 19.4%                       | 0.032   |
| <b>Mediation via Pain Catastrophising</b> |                  |               |         |                             |         |
| Fault                                     | -0.026           | -0.054,0.002  | 0.065   | 16.4%                       | 0.023   |
| <b>Mediation via Perceived Injustice</b>  |                  |               |         |                             |         |
| Compensation status                       | -0.050           | -0.087,-0.013 | 0.009   | 23.5%                       | 0.006   |
| Fault                                     | -0.084           | -0.125,-0.043 | <0.001  | 50.9%                       | 0.189   |

Notes, all analysis adjusted only for age, sex, pain intensity and injury severity.

Supplementary Table 3f

Combined mediation effects for the relationship between GoS-E and compensation status/fault

|                                | Fault attribution      | Compensation           |
|--------------------------------|------------------------|------------------------|
| <b>Total indirect effect</b>   |                        |                        |
| $\beta$ (95% CI)               | -0.089 (-0.133,-0.045) | -0.053 (-0.091,-0.016) |
| p-value                        | <0.001                 | 0.006                  |
| % of mediated                  |                        |                        |
| Total effect                   | 55.6%                  | 25.1%                  |
| Pain self-efficacy             | 5.6%                   | 3.8%                   |
| Perceived injustice            | 43.5%                  | 21.2%                  |
| Pain Catastrophising           | 6.5%                   | n/a                    |
| <b>Direct effect (p-value)</b> |                        |                        |
| $\beta$ (95% CI)               | -0.071 (-0.192,0.051)  | -0.159 (-0.278,-0.041) |
| p-value                        | 0.255                  | 0.009                  |

Notes, all analysis adjusted only for age, sex, pain intensity and injury severity.
